# Supplementary material for: Dual therapy maximizes nerve growth and functional recovery of muscle and bone
Source: Research Square preprint supplement (doi:10.21203/rs.3.rs-8835249/v1), 2026-02-22
Supplement: Supplementary file 1 [file cbd9f28a1e35639027918f9c.docx]

**Supplementary 2 (Tables)**

Table S1: Nerve regeneration (mean ± SEM) from Experiment 1 animals (n=7/group).

| **Length of regeneration (µm)** | **CES+EX** | **EX** | **CES** | **No Tx** | **One-way ANOVA** | **Tukey’s multiple comparisons test** | | | | | |
| --- | --- | --- | --- | --- | --- | --- | --- | --- | --- | --- | --- |
| CES+EX vs EX | CES+EX vs CES | CES+EX vs No Tx | EX vs CES | EX vs No Tx | CES vs No Tx |
| **Experiment 1** | 9.25 ± 1.00 | 5.29 ± 0.66 | 5.68 ± 0.57 | 2.12 ± 0.33 | **<0.001** | **0.002** | **0.006** | **<0.001** | NS | **0.02** | **0.006** |

CES: conditioning electrical stimulation, EX: exercise; No Tx: no peri-operative therapy

Table S2: Neuromuscular junction (mean ± SEM) of the tibialis anterior muscle comparing three-weeks exercise (n=5), Short-term exercise (n = 6/group), and Long-term exercise (n= 10/group) cohorts. Comparisons between exercise cohorts are also shown.

| **NMJ (%)** | **CES+EX** | **EX** | **CES** | **No Tx** | **One-way ANOVA** | **Tukey’s multiple comparisons test** | | | | | |
| --- | --- | --- | --- | --- | --- | --- | --- | --- | --- | --- | --- |
| CES+EX vs EX | CES+EX vs CES | CES+EX vs No Tx | EX vs CES | EX vs No Tx | CES vs No Tx |
| **Three-weeks EX** | 32.2 ± 4.36 | 4.00 ± 0.97 | 7.77 ± 2.50 | 2.81 ± 0.41 | **<0.001** | **<0.001** | **<0.001** | **<0.001** | NS | NS | NS |
| **Short-term EX** | 65.7 ± 2.29 | 54.5 ± 4.59 | 50.1 ± 2.21 | 27.8 ± 7.89 | **<0.001** | NS | NS | **<0.001** | NS | **0.006** | **0.02** |
| **Long-term EX** | 93.9 ± 3.09 | 80.4 ± 2.07 | 57.9 ± 7.23 | 33.5 ± 4.78 | **<0.001** | NS | **<0.001** | **<0.001** | **0.01** | **<0.001** | **0.006** |

| **Between cohorts** | **One-way ANOVA** | **Tukey’s multiple comparisons test** | | | |
| --- | --- | --- | --- | --- | --- |
|  |  | CES+EX | EX | CES | No Tx |
| All cohorts | **<0.001** |  |  |  |  |
| 3-weeks vs Short | **<0.001** | **<0.001** | **<0.001** | **<0.001** | **0.02** |
| 3 weeks vs Long | **<0.001** | **<0.001** | **<0.001** | **<0.001** | **0.006** |
| Short vs Long | **<0.001** | **<0.001** | **<0.001** | NS | NS |

NMJ: neuromuscular junction, CES: conditioning electrical stimulation, EX: exercise; No Tx: no peri-operative therapy

Table S3: Bone mineral density (mean ± SEM) comparisons for Short-term exercise (n = 6/group) and Long-term exercise (n=10/group). Comparisons between exercise cohorts are also shown.

| **BMD (g/cm3)** | **CES+EX** | **EX** | **CES** | **No Tx** | **One-way ANOVA** | **Tukey’s multiple comparisons test** | | | | | |
| --- | --- | --- | --- | --- | --- | --- | --- | --- | --- | --- | --- |
| CES+EX vs EX | CES+EX vs CES | CES+EX vs No Tx | EX vs CES | EX vs No Tx | CES vs No Tx |
| **Short-term EX** | 0.187 ± 0.007 | 0.150 ± 0.006 | 0.122 ± 0.005 | 0.085 ± 0.004 | **<0.001** | **<0.001** | **<0.001** | **<0.001** | **0.008** | **<0.001** | **<0.001** |
| **Long-term EX** | 0.204 ± 0.006 | 0.163 ± 0.006 | 0.130 ± 0.004 | 0.092 ± 0.006 | **<0.001** | **<0.001** | **<0.001** | **<0.001** | **<0.001** | **<0.001** | **<0.001** |
| **Between cohorts**  **(t-test)** | NS | NS | NS | NS |  | | | | | | |

BMD: Bone mineral density, CES: conditioning electrical stimulation, EX: exercise; No Tx: no peri-operative therapy

Table S4: Ankle angle (mean ± SEM) for Short-term exercise (n=6/group) compared to baseline (prior to injury).

| **Peak flexion at toe off** | Baseline | CES+EX | EX | CES | No Tx | **One-way ANOVA** | **Tukey’s multiple comparisons test** | | | | |
| --- | --- | --- | --- | --- | --- | --- | --- | --- | --- | --- | --- |
|  | Baseline vs CES+EX | Baseline vs EX | Baseline vs CES |  | Baseline vs No Tx |
| Week 7 | 131.0 ± 0.362 | 93.8 ± 0.526 | 93.0 ± 0.410 | 92.5 ± 0.320 | 92.0 ± 0.275 | **<0.001** | **<0.001** | **<0.001** | **<0.001** |  | **<0.001** |
| Week 12 | - | 105.0 ± 0.384 | 100.0 ± 0.425 | 94.8 ± 0.329 | 93.5 ± 0.357 | **<0.001** | **<0.001** | **<0.001** | **<0.001** |  | **<0.001** |
| **Between weeks 7 & 12 (t-test)** | - | **<0.001** | NS | NS | NS |  |  |  |  |  |  |
| **Peak dorsiflexion at mid-swing** | | | | | | | | | | | |
| Week 7 | 50.0 ± 0.375 | 91.9 ± 0.234 | 92.3 ± 0.244 | 92.4 ± 0.314 | 92.8 ± 0.327 | **<0.001** | **<0.001** | **<0.001** | **<0.001** |  | **<0.001** |
| Week 12 | - | 68.3 ± 0.652 | 80.2 ± 0.489 | 84.1 ± 0.559 | 90.3 ± 0.505 | **<0.001** | **<0.001** | **<0.001** | **<0.001** |  | **<0.001** |
| **Between weeks 7 & 12 (t-test)** | - | **<0.001** | **<0.001** | **0.006** | **0.032** |  |  |  |  |  |  |

CES: conditioning electrical stimulation, EX: exercise; No Tx: no peri-operative therapy

Table S5: Ankle angle comparisons for Short-term exercise (n = 6/group).

| **Peak flexion at toe off** | **One-way ANOVA** | **Tukey’s multiple comparisons test** | | | | | |
| --- | --- | --- | --- | --- | --- | --- | --- |
| CES+EX vs EX | CES+EX vs CES | CES+EX vs No Tx | EX vs CES | EX vs No Tx | CES vs No Tx |
| Week 7 | **0.018** | NS | NS | **0.017** | NS | NS | NS |
| Week 12 | **<0.001** | **<0.001** | **<0.001** | **<0.001** | **<0.001** | **<0.001** | NS |
| **Peak dorsiflexion at mid-swing** | | | | | | | |
| Week 7 | NS | NS | NS | NS | NS | NS | NS |
| Week 12 | **<0.001** | **<0.001** | **<0.001** | **<0.001** | **<0.001** | **<0.001** | **<0.001** |

CES: conditioning electrical stimulation, EX: exercise; No Tx: no peri-operative therapy

Table S6: Ankle angle (mean ± SEM) for Long-term exercise (n=10/group) compared to baseline (prior to injury).

| **Peak flexion at toe off** | Baseline | CES+EX | EX | CES | No Tx | **One-way ANOVA** | **Tukey’s multiple comparisons test** | | | | |
| --- | --- | --- | --- | --- | --- | --- | --- | --- | --- | --- | --- |
|  | Baseline vs CES+EX | Baseline vs EX | Baseline vs CES |  | Baseline vs No Tx |
| Week 7 | 131.0 ± 0.362 | 98.3 ± 0.364 | 93.1 ± 0.419 | 92.3 ± 0.332 | 91.9 ± 0.284 | **<0.001** | **<0.001** | **<0.001** | **<0.001** |  | **<0.001** |
| Week 12 | - | 106.0 ± 0.429 | 98.1 ± 0.381 | 96.2 ± 0.503 | 93.1 ± 0.360 | **<0.001** | **<0.001** | **<0.001** | **<0.001** |  | **<0.001** |
| **Between weeks 7 & 12 (t-test)** | - | NS | NS | **0.004** | NS |  |  |  |  |  |  |
| **Peak dorsiflexion at mid-swing** | | | | | | | | | | | |
| Week 7 | 50.0 ± 0.375 | 90.9 ± 0.436 | 91.8 ± 0.419 | 92.2 ± 0.349 | 92.5 ± 0.351 | **<0.001** | **<0.001** | **<0.001** | **<0.001** |  | **<0.001** |
| Week 12 | - | 60.3 ± 0.560 | 77.0 ± 0.650 | 81.4 ± 0.512 | 90.0 ± 0.511 | **<0.001** | **<0.001** | **<0.001** | **<0.001** |  | **<0.001** |
| **Between weeks 7 & 12 (t-test)** | - | NS | **<0.001** | NS | NS |  |  |  |  |  |  |

CES: conditioning electrical stimulation, EX: exercise; No Tx: no peri-operative therapy

Table S7: Ankle angle comparisons for Long-term exercise (n = 10/group) and comparisons between exercise cohorts.

| **Peak flexion at toe off** | **One-way ANOVA** | **Tukey’s multiple comparisons test** | | | | | |
| --- | --- | --- | --- | --- | --- | --- | --- |
| CES+EX vs EX | CES+EX vs CES | CES+EX vs No Tx | EX vs CES | EX vs No Tx | CES vs No Tx |
| Week 7 | **<0.001** | **<0.001** | **<0.001** | **<0.001** | NS | NS | NS |
| Week 12 | **<0.001** | **<0.001** | **<0.001** | **<0.001** | **0.01** | **<0.001** | **<0.001** |
| **Peak dorsiflexion at mid-swing** | | | | | | | |
| Week 7 | **0.025** | NS | NS | **0.03** | NS | NS | NS |
| Week 12 | **<0.001** | **<0.001** | **<0.001** | **<0.001** | **<0.001** | **<0.001** | **<0.001** |

| **Between cohorts (t-test)** | CES+EX | EX | CES | No Tx |
| --- | --- | --- | --- | --- |
| Week 7 (flexion) | **<0.001** | NS | NS | NS |
| Week 7 (dorsiflexion) | **0.003** | **0.032** | NS | NS |
| Week 12 (flexion) | NS | NS | **0.003** | NS |
| Week 12 (dorsiflexion) | NS | **0.015** | NS | NS |

CES: conditioning electrical stimulation, EX: exercise; No Tx: no peri-operative therapy

Table S8: Peak braking and propulsion forces (mean ± SEM) for Short-term exercise (n=6/group) compared to baseline (prior to injury).

| **Peak braking at 20%** | Baseline | CES+EX | EX | CES | No Tx | **One-way ANOVA** | **Tukey’s multiple comparisons test** | | | | |
| --- | --- | --- | --- | --- | --- | --- | --- | --- | --- | --- | --- |
|  | Baseline vs CES+EX | Baseline vs EX | Baseline vs CES |  | Baseline vs No Tx |
| Week 7 | -0.210 ± 0.002 | -0.162 ± 0.001 | -0.153 ± 0.001 | -0.143 ± 0.001 | -0.134 ± 0.001 | **<0.001** | **<0.001** | **<0.001** | **<0.001** |  | **<0.001** |
| Week 12 | - | -0.181 ± 0.002 | -0.159 ± 0.001 | -0.147 ± 0.001 | -0.135 ± 0.001 | **<0.001** | **<0.001** | **<0.001** | **<0.001** |  | **<0.001** |
| **Between weeks 7 & 12 (t-test)** | - | **<0.001** | NS | NS | NS |  |  |  |  |  |  |
| **Peak propulsion at 72.5%** | | | | | | | | | | | |
| Week 7 | 0.212 ± 0.001 | 0.025 ± 0.001 | 0.025 ± 0.001 | 0.017 ± 0.001 | 0.015 ± 0.001 | **<0.001** | **<0.001** | **<0.001** | **<0.001** |  | **<0.001** |
| Week 12 | - | 0.095 ± 0.003 | 0.056 ± 0.001 | 0.046 ± 0.002 | 0.030 ± 0.002 | **<0.001** | **<0.001** | **<0.001** | **<0.001** |  | **<0.001** |
| **Between weeks 7 & 12 (t-test)** | - | **<0.001** | **<0.001** | **0.005** | **<0.001** |  |  |  |  |  |  |

CES: conditioning electrical stimulation, EX: exercise; No Tx: no peri-operative therapy

Table S9: Peak braking and propulsion forces comparisons for Short-term exercise (n = 6/group).

| **Peak braking at 20%** | **One-way ANOVA** | **Tukey’s multiple comparisons test** | | | | | |
| --- | --- | --- | --- | --- | --- | --- | --- |
| CES+EX vs EX | CES+EX vs CES | CES+EX vs No Tx | EX vs CES | EX vs No Tx | CES vs No Tx |
| Week 7 | **<0.001** | **<0.001** | **<0.001** | **<0.001** | **<0.001** | **<0.001** | **<0.001** |
| Week 12 | **<0.001** | **<0.001** | **<0.001** | **<0.001** | **<0.001** | **<0.001** | **<0.001** |
| **Peak propulsion at 72.5%** | | | | | | | |
| 7 | **<0.001** | NS | **<0.001** | **<0.001** | **<0.001** | **<0.001** | NS |
| 12 | **<0.001** | **<0.001** | **<0.001** | **<0.001** | **<0.001** | **<0.001** | **<0.001** |

CES: conditioning electrical stimulation, EX: exercise; No Tx: no peri-operative therapy

Table S10: Peak braking and propulsion forces (mean ± SEM) for Long-term exercise (n=10/group) compared to baseline (prior to injury).

| **Peak braking at 20%** | Baseline | CES+EX | EX | CES | No Tx | **One-way ANOVA** | **Tukey’s multiple comparisons test** | | | | |
| --- | --- | --- | --- | --- | --- | --- | --- | --- | --- | --- | --- |
|  | Baseline vs CES+EX | Baseline vs EX | Baseline vs CES |  | Baseline vs No Tx |
| Week 7 | -0.210 ± 0.002 | -0.170 ± 0.001 | -0.160 ± 0.001 | -0.150 ± 0.001 | -0.140 ± 0.001 | **<0.001** | **<0.001** | **<0.001** | **<0.001** |  | **<0.001** |
| Week 12 | - | -0.180 ± 0.001 | -0.163 ± 0.002 | -0.153 ± 0.001 | -0.143 ± 0.001 | **<0.001** | **<0.001** | **<0.001** | **<0.001** |  | **<0.001** |
| **Between weeks 7 & 12 (t-test)** | - | **<0.001** | **<0.001** | **<0.001** | **0.027** |  |  |  |  |  |  |
| **Peak propulsion at 72.5%** | | | | | | | | | | | |
| Week 7 | 0.212 ± 0.001 | 0.030 ± 0.001 | 0.025 ± 0.001 | 0.025 ± 0.001 | 0.015 ± 0.001 | **<0.001** | **<0.001** | **<0.001** | **<0.001** |  | **<0.001** |
| Week 12 | - | 0.111 ± 0.001 | 0.065 ± 0.001 | 0.056 ± 0.001 | 0.031 ± 0.001 | **<0.001** | **<0.001** | **<0.001** | **<0.001** |  | **<0.001** |
| **Between weeks 7 & 12 (t-test)** | - | **0.013** | **0.004** | NS | **<0.001** |  |  |  |  |  |  |

CES: conditioning electrical stimulation, EX: exercise; No Tx: no peri-operative therapy

Table S11: Peak braking and propulsion comparisons for Long-term exercise (n = 10/group) and comparisons between exercise cohorts.

| **Peak braking at 20%** | **One-way ANOVA** | **Tukey’s multiple comparisons test** | | | | | |
| --- | --- | --- | --- | --- | --- | --- | --- |
| CES+EX vs EX | CES+EX vs CES | CES+EX vs No Tx | EX vs CES | EX vs No Tx | CES vs No Tx |
| Week 7 | **<0.001** | **<0.001** | **<0.001** | **<0.001** | **<0.001** | **<0.001** | **<0.001** |
| Week 12 | **<0.001** | **<0.001** | **<0.001** | **<0.001** | **<0.001** | **<0.001** | **<0.001** |
| **Peak propulsion at 72.5%** | | | | | | | |
| Week 7 | **<0.001** | **<0.001** | **<0.001** | **<0.001** | **<0.001** | **<0.001** | **<0.001** |
| Week 12 | **<0.001** | **<0.001** | **<0.001** | **<0.001** | **<0.001** | **<0.001** | **<0.001** |

| **Between cohorts (t-test)** | CES+EX | EX | CES | No Tx |
| --- | --- | --- | --- | --- |
| Week 7 (braking) | **<0.001** | **<0.001** | **<0.001** | **0.001** |
| Week 7 (propulsion) | NS | NS | NS | NS |
| Week 12 (braking) | **0.01** | NS | NS | NS |
| Week 12 (propulsion) | **0.003** | NS | **0.05** | **0.03** |

CES: conditioning electrical stimulation, EX: exercise; No Tx: no peri-operative therapy

Table S12: Duty factor (mean ± SEM) comparisons for Short-term exercise (n = 6/group) from weeks 7, 10, 11, and 12 post DNT surgery.

| **Weeks** | CES+EX | EX | CES | No Tx | **Two-way ANOVA** | **Tukey’s multiple comparisons test** | | | | | |
| --- | --- | --- | --- | --- | --- | --- | --- | --- | --- | --- | --- |
| CES+EX vs EX | CES+EX vs CES | CES+EX vs No Tx | EX vs CES | EX vs No Tx | CES vs No Tx |
| 7 | 0.046 ± 0.002 | 0.060 ± 0.002 | 0.064 ± 0.004 | 0.066 ± 0.004 | **<0.001** | **<0.001** | **0.001** | **<0.001** | NS | NS | NS |
| 10 | 0.039 ± 0.001 | 0.046 ± 0.001 | 0.053 ± 0.002 | 0.062 ± 0.003 | **<0.001** | **0.007** | **<0.001** | **<0.001** | **0.043** | **<0.001** | NS |
| 11 | 0.036 ± 0.002 | 0.036 ± 0.001 | 0.045 ± 0.001 | 0.056 ± 0.002 | **<0.001** | NS | **0.001** | **<0.001** | **<0.001** | **<0.001** | **<0.001** |
| 12 | 0.021 ± 0.002 | 0.034 ± 0.002 | 0.040 ± 0.002 | 0.049 ± 0.002 | **<0.001** | **<0.001** | **<0.001** | **<0.001** | NS | **<0.001** | **0.005** |
| **Between weeks** | **(Two-way ANOVA)** |  |  |  |  | 7 vs 10 | 7 vs 11 | 7 vs 12 | 10 vs 11 | 10 vs 12 | 11 vs 12 |
|  |  |  |  |  |  | **<0.001** | **<0.001** | **<0.001** | **<0.001** | **<0.001** | **<0.001** |

CES: conditioning electrical stimulation, EX: exercise; No Tx: no peri-operative therapy: DNT: distal nerve transfer

Table S13: Duty factor (mean ± SEM) comparisons for Long-term exercise (n=10/group) from weeks 7, 10, 11,12 post DNT surgery and comparisons between exercise cohorts.

| **Weeks** | CES+EX | EX | CES | No Tx | **Two-way ANOVA** | **Tukey’s multiple comparisons test** | | | | | |
| --- | --- | --- | --- | --- | --- | --- | --- | --- | --- | --- | --- |
| CES+EX vs EX | CES+EX vs CES | CES+EX vs No Tx | EX vs CES | EX vs No Tx | CES vs No Tx |
| 7 | 0.047 ± 0.002 | 0.060 ± 0.002 | 0.064 ± 0.003 | 0.065 ± 0.002 | **<0.001** | **<0.001** | **<0.001** | **<0.001** | **0.04** | **0.008** | NS |
| 10 | 0.041 ± 0.001 | 0.046 ± 0.001 | 0.056 ± 0.002 | 0.063 ± 0.002 | **<0.001** | **<0.001** | **<0.001** | **<0.001** | **<0.001** | **<0.001** | **0.008** |
| 11 | 0.033 ± 0.001 | 0.039 ± 0.001 | 0.046 ± 0.001 | 0.058 ± 0.002 | **<0.001** | **0.002** | **<0.001** | **<0.001** | **<0.001** | **<0.001** | **<0.001** |
| 12 | 0.021 ± 0.001 | 0.035 ± 0.001 | 0.041 ± 0.001 | 0.051 ± 0.001 | **<0.001** | **<0.001** | **<0.001** | **<0.001** | **0.005** | **<0.001** | **<0.001** |
| **Between weeks** | **(Two-way ANOVA)** |  |  |  |  | 7 vs 10 | 7 vs 11 | 7 vs 12 | 10 vs 11 | 10 vs 12 | 11 vs 12 |
|  |  |  |  |  |  | **<0.001** | **<0.001** | **<0.001** | **<0.001** | **<0.001** | **<0.001** |

| **Between cohorts (t-test)** | CES+EX | EX | CES | No Tx |
| --- | --- | --- | --- | --- |
| 7 | NS | NS | NS | NS |
| 10 | NS | NS | NS | NS |
| 11 | NS | NS | NS | NS |
| 12 | NS | NS | NS | NS |

CES: conditioning electrical stimulation, EX: exercise; No Tx: no peri-operative therapy: DNT: distal nerve transfer

Table S14: Vertical peak force (mean ± SEM) for Short-term exercise (n=6/group) from weeks 7, 10, 11, 12 post DNT surgery.

| **Weeks** | CES+EX | EX | CES | No Tx | **Two-way ANOVA** | **Tukey’s multiple comparisons test** | | | | | |
| --- | --- | --- | --- | --- | --- | --- | --- | --- | --- | --- | --- |
| CES+EX vs EX | CES+EX vs CES | CES+EX vs No Tx | EX vs CES | EX vs No Tx | CES vs No Tx |
| 7 | 0.656 ± 0.003 | 0.616 ± 0.004 | 0.572 ± 0.008 | 0.565 ± 0.009 | **<0.001** | **<0.001** | **0.001** | **<0.001** | **<0.001** | **<0.001** | NS |
| 10 | 0.690 ± 0.002 | 0.648 ± 0.002 | 0.622 ± 0.003 | 0.581 ± 0.007 | **<0.001** | **<0.001** | **<0.001** | **<0.001** | **<0.001** | **<0.001** | **<0.001** |
| 11 | 0.727 ± 0.002 | 0.672 ± 0.003 | 0.653 ± 0.003 | 0.613 ± 0.004 | **<0.001** | **<0.001** | **<0.001** | **<0.001** | **<0.001** | **<0.001** | **<0.001** |
| 12 | 0.764 ± 0.004 | 0.722 ± 0.002 | 0.688 ± 0.005 | 0.626 ± 0.003 | **<0.001** | **<0.001** | **<0.001** | **<0.001** | **<0.001** | **<0.001** | **<0.001** |
| **Between weeks** |  |  |  |  |  | 7 vs 10 | 7 vs 11 | 7 vs 12 | 10 vs 11 | 10 vs 12 | 11 vs 12 |
|  |  |  |  |  |  | **<0.001** | **<0.001** | **<0.001** | **<0.001** | **<0.001** | **<0.001** |

CES: conditioning electrical stimulation, EX: exercise; No Tx: no peri-operative therapy; DNT: distal nerve transfer

Table S15: Vertical peak force (mean ± SEM) for Long-term exercise (n=10/group) from weeks 7, 10, 11, 12 post DNT surgery and comparisons between exercise cohorts.

| **Weeks** | CES+EX | EX | CES | No Tx | **Two-way ANOVA** | **Tukey’s multiple comparisons test** | | | | | | |
| --- | --- | --- | --- | --- | --- | --- | --- | --- | --- | --- | --- | --- |
| CES+EX vs EX | CES+EX vs CES | CES+EX vs No Tx | EX vs CES | EX vs No Tx | CES vs No Tx | |
| 7 | 0.661 ± 0.002 | 0.621 ± 0.003 | 0.596 ± 0.007 | 0.587 ± 0.008 | **<0.001** | **<0.001** | **<0.001** | **<0.001** | **0.007** | **<0.001** | | NS |
| 10 | 0.682 ± 0.002 | 0.651 ± 0.003 | 0.630 ± 0.003 | 0.600 ± 0.006 | **<0.001** | **<0.001** | **<0.001** | **<0.001** | **0.001** | **<0.001** | | **<0.001** |
| 11 | 0.725 ± 0.002 | 0.671 ± 0.002 | 0.649 ± 0.003 | 0.617 ± 0.003 | **<0.001** | **<0.001** | **<0.001** | **<0.001** | **<0.001** | **<0.001** | | **<0.001** |
| 12 | 0.764 ± 0.003 | 0.716 ± 0.002 | 0.686 ± 0.004 | 0.629 ± 0.00 | **<0.001** | **<0.001** | **<0.001** | **<0.001** | **0.005** | **<0.001** | | **<0.001** |
| **Between weeks** |  |  |  |  |  | 7 vs 10 | 7 vs 11 | 7 vs 12 | 10 vs 11 | 10 vs 12 | | 11 vs 12 |
|  |  |  |  |  |  | **<0.001** | **<0.001** | **<0.001** | **<0.001** | **<0.001** | | **<0.001** |

| **Between cohorts (t-test)** | CES+EX | EX | CES | No Tx |
| --- | --- | --- | --- | --- |
| 7 | NS | NS | NS | NS |
| 10 | NS | **<0.001** | NS | NS |
| 11 | NS | NS | NS | NS |
| 12 | NS | NS | NS | NS |

CES: conditioning electrical stimulation, EX: exercise; No Tx: no peri-operative therapy: DNT: distal nerve transfer

Table S16: Ladder run foot placement scores (mean ± SEM) for Short-term exercise (n=6/group) from weeks 7, 8, 9, 10, 11, 12 post DNT surgery.

| Weeks | CES+EX | EX | CES | No Tx | **Two-way ANOVA** | **Tukey’s multiple comparisons test** | | | | | |
| --- | --- | --- | --- | --- | --- | --- | --- | --- | --- | --- | --- |
| CES+EX vs EX | CES+EX vs CES | CES+EX vs No Tx | EX vs CES | EX vs No Tx | CES vs No Tx |
| 7 | 3.49 ± 0.12 | 3.41 ± 0.14 | 3.92 ± 0.3 | 2.87 ± 0.2 | **0.01** | NS | NS | NS | NS | NS | NS |
| 8 | 4.29 ± 0.32 | 4.19 ± 0.35 | 4.29 ± 0.11 | 2.91 ± 0.13 | **0.003** | NS | NS | **0.024** | NS | **0.05** | **<0.001** |
| 9 | 4.56 ± 0.13 | 4.58 ± 0.21 | 4.23 ± 0.14 | 3.42 ± 0.16 | **<0.001** | NS | NS | **0.001** | NS | **0.007** | **0.019** |
| 10 | 4.61 ± 0.08 | 4.78 ± 0.21 | 4.21 ± 0.10 | 3.65 ± 0.18 | **<0.001** | NS | NS | **0.007** | NS | **0.009** | NS |
| 11 | 5.12 ± 0.23 | 4.76 ± 0.23 | 4.20 ± 0.29 | 3.72 ± 0.17 | **0.002** | NS | NS | **0.004** | NS | **0.021** | NS |
| 12 | 5.38 ± 0.14 | 5.02 ± 0.12 | 4.34 ± 0.25 | 3.86 ± 0.24 | **<0.001** | NS | **0.035** | **0.003** | NS | **0.013** | NS |

CES: conditioning electrical stimulation, EX: exercise; No Tx: no peri-operative therapy: DNT: distal nerve transfer

Table S17: Ladder run foot placement comparison for Short-term exercise for weeks 7, 8, 9, 10, 11, 12 post DNT surgery.

| **Weeks** | **Tukey’s multiple comparisons test** | **CES+EX** | **EX** | **CES** | **No Tx** |
| --- | --- | --- | --- | --- | --- |
| 7 vs 8 | **0.034** | NS | NS | NS | NS |
| 7 vs 9 | **<0.001** | **0.028** | **0.013** | NS | NS |
| 7 vs 10 | **<0.001** | **0.001** | **0.018** | NS | NS |
| 7 vs 11 | **<0.001** | **0.013** | **0.039** | NS | NS |
| 7 vs 12 | **<0.001** | **0.002** | **<0.001** | NS | NS |
| 8 vs 9 | NS | NS | NS | NS | NS |
| 8 vs 10 | NS | NS | NS | NS | **0.026** |
| 8 vs 11 | NS | NS | NS | NS | NS |
| 8 vs 12 | **0.002** | NS | NS | NS | NS |
| 9 vs 10 | NS | NS | NS | NS | NS |
| 9 vs 11 | NS | NS | NS | NS | NS |
| 9 vs 12 | **0.007** | NS | NS | NS | NS |
| 10 vs 11 | NS | NS | NS | NS | NS |
| 10 vs 12 | NS | **0.014** | NS | NS | NS |
| 11 vs 12 | NS | NS | NS | NS | NS |

CES: conditioning electrical stimulation, EX: exercise; No Tx: no peri-operative therapy: DNT: distal nerve transfer

Table S18: Ladder run foot placement scores (mean ± SEM) for Long-term exercise (n=10/group) from weeks 7, 8, 9, 10, 11, 12 post DNT surgery.

| Weeks | CES+EX | EX | CES | No Tx | **Two-way ANOVA** | **Tukey’s multiple comparisons test** | | | | | |
| --- | --- | --- | --- | --- | --- | --- | --- | --- | --- | --- | --- |
| CES+EX vs EX | CES+EX vs CES | CES+EX vs No Tx | EX vs CES | EX vs No Tx | CES vs No Tx |
| 7 | 4.63 ± 0.18 | 4.26 ± 0.06 | 3.87 ± 0.17 | 3.31 ± 0.36 | **0.002** | NS | **0.032** | **0.027** | NS | NS | NS |
| 8 | 4.69 ± 0.17 | 4.44 ± 0.14 | 4.12 ± 0.19 | 3.15 ± 0.33 | **<0.001** | NS | NS | **0.06** | NS | **0.017** | NS |
| 9 | 5.04 ± 0.15 | 4.76 ± 0.16 | 4.46 ± 0.23 | 4.03 ± 0.27 | **0.018** | NS | NS | **0.027** | NS | NS | NS |
| 10 | 5.11 ± 0.08 | 4.72 ± 0.06 | 4.47 ± 0.23 | 3.81 ± 0.34 | **0.002** | **0.07** | NS | **0.019** | NS | NS | NS |
| 11 | 5.07 ± 0.1 | 4.78 ± 0.13 | 4.48 ± 0.15 | 3.77 ± 0.28 | **<0.001** | NS | **0.023** | **0.004** | NS | **0.026** | NS |
| 12 | 5.0± 0.08 | 4.76 ± 0.11 | 4.61 ± 0.12 | 3.81 ± 0.27 | **<0.001** | NS | NS | **0.008** | NS | **0.028** | NS |

CES: conditioning electrical stimulation, EX: exercise; No Tx: no peri-operative therapy: DNT: distal nerve transfer

Table S19: Ladder run foot placement comparison for Lhort-term exercise for weeks 7, 8, 9, 10, 11, 12 post DNT surgery. Comparisons between exercise cohorts are also shown.

| **Weeks** | **Tukey’s multiple comparisons test** | **CES+EX** | **EX** | **CES** | **No Tx** |
| --- | --- | --- | --- | --- | --- |
| 7 vs 8 | NS | NS | NS | NS | NS |
| 7 vs 9 | **<0.001** | NS | NS | NS | NS |
| 7 vs 10 | **<0.001** | NS | **0.007** | NS | NS |
| 7 vs 11 | **<0.001** | NS | **0.026** | **0.01** | NS |
| 7 vs 12 | **<0.001** | NS | **0.033** | **<0.001** | NS |
| 8 vs 9 | **<0.001** | NS | NS | NS | **0.017** |
| 8 vs 10 | **0.005** | NS | NS | NS | NS |
| 8 vs 11 | **0.012** | NS | NS | NS | NS |
| 8 vs 12 | **0.009** | NS | NS | NS | NS |
| 9 vs 10 | NS | NS | NS | NS | NS |
| 9 vs 11 | NS | NS | NS | NS | NS |
| 9 vs 12 | NS | NS | NS | NS | NS |
| 10 vs 11 | NS | NS | NS | NS | NS |
| 10 vs 12 | NS | NS | NS | NS | NS |
| 11 vs 12 | NS | NS | NS | NS | NS |

| **Between cohorts (t-test)** | CES+EX | EX | CES | No Tx |
| --- | --- | --- | --- | --- |
| 7 | NS | NS | NS | NS |
| 10 | NS | NS | NS | NS |
| 11 | NS | NS | NS | NS |
| 12 | NS | NS | NS | NS |

CES: conditioning electrical stimulation, EX: exercise; No Tx: no peri-operative therapy: DNT: distal nerve transfer
